# Supplementary material for: Selected to survive and kill: Tityus serrulatus, the Brazilian yellow scorpion
Source: PubMed Central journal article supplement (PMC6447240; doi:10.1371/journal.pone.0214075), 2019-04-03
Supplement: pone.0214075.s001.pdf [file pone.0214075.s001.pdf]

| Days elapsed | Number of scorpions found dead |    |    |     |
|--------------|--------------------------------|----|----|-----|
|              | C                              | FD | WD | FWD |
| 1            | 0                              | 0  | 1  | 0   |
| 3            | 1                              | 0  | 3  | 1   |
| 4            | 0                              | 1  | 0  | 0   |
| 5            | 2                              | 3  | 0  | 0   |
| 6            | 0                              | 1  | 1  | 6   |
| 7            | 5                              | 3  | 13 | 9   |
| 8            | 0                              | 0  | 5  | 3   |
| 9            | 1                              | 0  | 6  | 9   |
| 10           | 0                              | 0  | 3  | 1   |
| 11           | 1                              | 0  | 5  | 3   |
| 12           | 0                              | 1  | 0  | 0   |
| 13           | 0                              | 0  | 1  | 0   |
| 14           | 2                              | 1  | 6  | 11  |
| 15           | 1                              | 1  | 7  | 14  |
| 16           | 0                              | 0  | 1  | 2   |
| 17           | 0                              | 0  | 2  | 0   |
| 18           | 0                              | 0  | 3  | 1   |
| 19           | 1                              | 1  | 0  | 0   |
| 20           | 0                              | 1  | 7  | 12  |
| 21           | 0                              | 0  | 8  | 8   |
| 22           | 1                              | 1  | 0  | 0   |
| 23           | 0                              | 0  | 6  | 5   |
| 25           | 1                              | 0  | 1  | 1   |
| 27           | 0                              | 2  | 1  | 5   |
| 28           | 1                              | 1  | 4  | 2   |
| 29           | 0                              | 0  | 2  | 1   |
| 30           | 0                              | 2  | 1  | 0   |
| 31           | 1                              | 1  | 2  | 1   |
| 34           | 0                              | 1  | 0  | 0   |
| 35           | 1                              | 0  | 2  | 0   |
| 36           | 0                              | 0  | 2  | 1   |
| 37           | 0                              | 0  | 0  | 1   |
| 38           | 1                              | 0  | 1  | 0   |
| 39           | 0                              | 0  | 1  | 1   |
| 41           | 2                              | 4  | 0  | 0   |
| 42           | 0                              | 0  | 0  | 2   |
| 43           | 0                              | 1  | 0  | 0   |
| 46           | 0                              | 0  | 1  | 1   |
| 49           | 1                              | 0  | 1  | 1   |
| 52           | 0                              | 1  | 0  | 0   |
| 56           | 1                              | 1  | 0  | 0   |
| 62           | 0                              | 2  | 0  | 0   |
| 63           | 0                              | 1  | 1  | 1   |
| 65           | 0                              | 0  | 1  | 1   |
| 69           | 1                              | 1  | 0  | 0   |
| 70           | 0                              | 2  | 0  | 0   |
| 76           | 0                              | 2  | 0  | 0   |
| 79           | 0                              | 1  | 0  | 0   |
| 83           | 1                              | 1  | 0  | 0   |
| 84           | 0                              | 1  | 0  | 0   |
| 85           | 0                              | 1  | 0  | 0   |
| 87           | 0                              | 2  | 1  | 1   |
| 90           | 2                              | 1  |    |     |
| 97           | 0                              | 1  |    |     |
| 98           | 0                              | 1  |    |     |
| 99           | 2                              | 2  |    |     |
| 104          | 0                              | 1  |    |     |
| 106          | 1                              | 1  |    |     |
| 111          | 0                              | 2  |    |     |
| 112          | 0                              | 1  |    |     |
| 113          | 0                              | 2  |    |     |
| 118          | 0                              | 3  |    |     |
| 120          | 2                              | 1  |    |     |
| 123          | 2                              | 1  |    |     |
| 130          | 2                              | 3  |    |     |

**S1 Table: Number of *Tityus serrulatus* scorpions found dead daily.** See below for complete caption.

| Days elapsed | Number of scorpions found dead |    |    |     |
|--------------|--------------------------------|----|----|-----|
|              | C                              | FD | WD | FWD |
| 132          | 0                              | 1  |    |     |
| 133          | 0                              | 2  |    |     |
| 134          | 1                              | 6  |    |     |
| 140          | 1                              | 5  |    |     |
| 146          | 0                              | 1  |    |     |
| 147          | 2                              | 2  |    |     |
| 153          | 0                              | 2  |    |     |
| 154          | 2                              | 0  |    |     |
| 156          | 0                              | 3  |    |     |
| 161          | 1                              | 2  |    |     |
| 163          | 1                              | 2  |    |     |
| 164          | 0                              | 1  |    |     |
| 167          | 2                              | 1  |    |     |
| 168          | 0                              | 1  |    |     |
| 169          | 0                              | 3  |    |     |
| 174          | 0                              | 5  |    |     |
| 175          | 1                              | 0  |    |     |
| 176          | 1                              | 0  |    |     |
| 179          | 1                              | 2  |    |     |
| 183          | 0                              | 2  |    |     |
| 189          | 1                              | 0  |    |     |
| 190          | 1                              | 1  |    |     |
| 195          | 0                              | 1  |    |     |
| 198          | 0                              | 1  |    |     |
| 202          | 0                              | 1  |    |     |
| 203          | 2                              | 1  |    |     |
| 209          | 0                              | 1  |    |     |
| 216          | 1                              | 3  |    |     |
| 223          | 0                              | 1  |    |     |
| 224          | 0                              | 1  |    |     |
| 230          | 1                              | 1  |    |     |
| 231          | 0                              | 2  |    |     |
| 232          | 0                              | 2  |    |     |
| 237          | 2                              | 1  |    |     |
| 241          | 0                              | 1  |    |     |
| 244          | 0                              | 1  |    |     |
| 258          | 0                              | 2  |    |     |
| 259          | 1                              | 0  |    |     |
| 261          | 0                              | 1  |    |     |
| 266          | 0                              | 1  |    |     |
| 279          | 0                              | 2  |    |     |
| 286          | 0                              | 2  |    |     |
| 300          | 0                              | 1  |    |     |
| 301          | 1                              | 0  |    |     |
| 304          | 0                              | 1  |    |     |
| 309          | 0                              | 1  |    |     |
| 314          | 0                              | 1  |    |     |
| 316          | 1                              | 0  |    |     |
| 320          | 0                              | 1  |    |     |
| 323          | 1                              | 0  |    |     |
| 328          | 2                              | 0  |    |     |
| 336          | 0                              | 1  |    |     |
| 338          | 2                              | 0  |    |     |
| 342          | 1                              | 0  |    |     |
| 344          | 0                              | 1  |    |     |
| 350          | 1                              | 0  |    |     |
| 357          | 0                              | 1  |    |     |
| 367          | 1                              | 0  |    |     |
| 379          | 1                              | 1  |    |     |
| 398          | 1                              | 0  |    |     |
| 400          | 1                              | 1  |    |     |

**S1 Table: Number of *Tityus serrulatus* scorpions found dead daily.** Experimental groups were checked daily for dead scorpions. This data is representative of the three independent series of experiments that were conducted, and was employed to perform the Kaplan-Meier survival analysis (Fig 1). C: Control; FD: Food deprivation; WD: Water deprivation; FWD: Food and water deprivation.
