# Supplementary material for: Selected to survive and kill: Tityus serrulatus, the Brazilian yellow scorpion
Source: PubMed Central journal article supplement (PMC6447240; doi:10.1371/journal.pone.0214075), 2019-04-03
Supplement: pone.0214075.s002.pdf [file pone.0214075.s002.pdf]

| Time (weeks) | 1st experiment |       |       |       |       |       |       |       |       |       | 2nd experiment |       |       |       |       |       |       |       |       |       |       |       |       |       |       |       |       |
|--------------|----------------|-------|-------|-------|-------|-------|-------|-------|-------|-------|----------------|-------|-------|-------|-------|-------|-------|-------|-------|-------|-------|-------|-------|-------|-------|-------|-------|
|              | C1             | C2    | C3    | C4    | C5    | FD1   | FD2   | FD3   | FD4   | FD5   | C1             | C2    | C3    | C4    | C5    | FD1   | FD2   | FD3   | FD4   | FD5   | WD1   | WD2   | FWD1  | FWD2  | FWD3  | FWD4  | FWD5  |
| 0            | 100.0          | 100.0 | 100.0 | 100.0 | 100.0 | 100.0 | 100.0 | 100.0 | 100.0 | 100.0 | 100.0          | 100.0 | 100.0 | 100.0 | 100.0 | 100.0 | 100.0 | 100.0 | 100.0 | 100.0 | 100.0 | 100.0 | 100.0 | 100.0 | 100.0 | 100.0 | 100.0 |
| 2            | 101.9          | 97.3  | 110.2 | 102.2 | 109.7 | 100.0 | 96.8  | 97.9  | 101.5 | 93.8  | 96.4           | 105.1 | 92.6  | 93.9  | 102.0 | 106.3 | 92.7  | 94.6  | 99.8  | 102.8 | 92.0  | 79.2  | 79.8  | 90.2  | 74.3  | 79.7  | 92.7  |
| 6            | 101.5          | 96.8  | 106.6 | 105.0 | 118.1 | 103.3 | 106.1 | 100.2 | 100.3 | 96.3  | 99.2           | 114.6 | 96.4  | 102.6 | 111.7 | 89.9  | 94.5  | 63.4  | 80.0  | 96.2  | 97.1  |       |       |       |       |       |       |
| 8            | 102.2          | 100.8 | 107.8 | 106.3 | 124.3 | 101.9 | 104.8 | 98.4  | 99.2  | 97.2  | 103.2          | 125.3 | 99.1  | 102.6 | 107.8 | 89.7  | 90.6  | 86.6  | 84.7  | 98.8  |       |       |       |       |       |       |       |
| 10           | 105.3          | 96.8  | 106.8 | 105.0 | 127.1 | 101.8 | 108.4 | 99.3  | 96.7  | 98.5  | 102.3          | 111.9 | 98.4  | 117.1 | 107.0 | 88.4  | 88.0  | 78.6  | 85.7  | 90.1  |       |       |       |       |       |       |       |
| 12           | 107.1          | 94.8  | 99.4  | 99.4  | 119.1 | 97.1  | 100.0 | 91.5  | 83.8  | 95.3  | 105.7          | 119.0 | 102.4 | 116.9 | 110.4 | 88.4  | 87.2  | 85.1  | 87.7  | 98.8  |       |       |       |       |       |       |       |
| 14           | 110.8          | 94.9  | 104.9 | 105.7 | 127.1 | 90.9  | 92.5  | 88.8  | 81.7  | 91.5  | 105.8          | 112.4 | 104.1 | 121.7 | 115.7 | 85.3  | 85.8  | 81.6  | 86.0  | 93.5  |       |       |       |       |       |       |       |
| 16           | 106.1          | 95.5  | 106.9 | 100.3 | 119.9 | 89.7  | 89.8  | 87.7  | 78.4  | 96.8  | 109.5          | 114.0 | 107.9 | 122.7 | 114.4 | 84.5  | 82.8  | 79.8  | 84.6  | 97.4  |       |       |       |       |       |       |       |
| 19           | 102.5          | 97.7  | 103.4 | 107.8 | 125.2 | 93.8  | 91.3  | 89.7  | 76.3  | 90.1  | 107.2          | 113.7 | 105.1 | 125.0 | 120.4 | 85.3  | 80.2  | 80.4  | 80.8  | 105.3 |       |       |       |       |       |       |       |
| 21           | 104.4          | 95.4  | 100.4 | 107.0 | 121.1 | 88.9  | 96.0  | 88.2  | 73.3  | 85.5  | 108.4          | 114.4 | 108.8 | 124.4 | 113.8 | 85.1  | 73.5  | 79.5  | 84.7  | 103.8 |       |       |       |       |       |       |       |
| 24           | 105.2          | 89.5  | 99.1  | 108.3 | 139.8 | 81.3  | 89.8  | 83.4  | 71.2  | 99.4  | 105.7          | 113.7 | 108.6 | 131.5 | 113.7 | 92.5  | 81.9  | 89.9  | 83.4  | 99.0  |       |       |       |       |       |       |       |
| 26           | 103.1          | 93.8  | 96.7  | 108.6 | 140.8 | 88.5  | 87.3  | 87.5  | 84.0  | 99.4  | 111.6          | 115.6 | 106.1 | 128.5 | 110.2 | 96.1  | 77.2  | 108.0 | 88.4  | 94.0  |       |       |       |       |       |       |       |
| 28           | 102.5          | 95.7  | 95.7  | 96.0  | 136.3 | 88.5  | 86.0  | 86.0  | 81.5  | 96.4  | 107.9          | 115.1 | 108.1 | 124.9 | 112.7 | 100.0 | 80.7  | 95.9  | 86.3  | 106.3 |       |       |       |       |       |       |       |
| 30           | 98.4           | 83.5  | 90.3  | 107.9 | 127.5 | 86.2  | 90.5  | 76.3  |       | 111.9 | 99.5           | 114.1 | 102.2 | 118.1 | 112.1 | 96.1  | 80.1  | 0.0   | 83.1  | 106.0 |       |       |       |       |       |       |       |
| 34           | 108.0          | 95.9  | 90.1  | 104.0 | 130.2 | 80.6  | 88.6  | 69.1  |       | 105.5 | 98.1           | 111.7 | 98.5  | 115.3 | 113.7 | 93.0  | 82.7  | 0.0   | 85.4  | 126.8 |       |       |       |       |       |       |       |
| 36           | 107.6          | 87.3  | 93.9  | 102.6 | 129.9 | 85.1  | 87.1  | 70.6  |       | 105.9 | 99.0           | 114.4 | 105.0 | 120.9 | 115.1 | 93.8  | 86.6  | 0.0   | 83.1  | 113.8 |       |       |       |       |       |       |       |
| 38           | 105.8          | 93.6  | 105.4 | 102.3 | 134.3 | 89.2  | 96.6  | 67.4  |       | 103.6 | 88.0           | 105.6 | 95.0  | 116.6 | 106.5 | 85.3  | 76.4  | 0.0   | 70.1  | 111.2 |       |       |       |       |       |       |       |
| 40           | 101.6          | 95.4  | 96.2  | 106.5 | 133.5 |       | 81.5  | 67.8  |       | 101.4 | 96.3           | 107.2 | 93.8  | 118.3 | 100.6 | 89.9  | 78.7  | 0.0   | 73.9  | 107.7 |       |       |       |       |       |       |       |
| 42           | 103.3          | 93.6  | 95.7  | 98.1  | 140.9 |       | 80.6  | 62.6  |       | 94.1  | 91.6           | 99.8  | 96.0  | 117.2 | 100.6 | 82.2  | 74.0  | 0.0   | 78.5  | 105.1 |       |       |       |       |       |       |       |
| 48           | 123.5          | 115.0 | 110.2 | 112.0 | 144.8 |       |       | 59.2  |       |       | 94.5           | 99.9  | 97.4  | 112.8 | 102.0 | 75.2  |       |       |       |       |       |       |       |       |       |       |       |
| 50           |                |       |       |       |       |       |       |       |       |       | 98.5           | 102.6 | 94.0  | 111.0 | 104.4 | 74.4  |       |       |       |       |       |       |       |       |       |       |       |
| 52           |                |       |       |       |       |       |       |       |       |       | 91.5           | 103.0 | 96.7  | 114.5 | 99.5  | 82.9  |       |       |       |       |       |       |       |       |       |       |       |
| 54           |                |       |       |       |       |       |       |       |       |       | 104.2          | 106.6 | 107.9 | 116.7 | 105.2 | 89.9  |       |       |       |       |       |       |       |       |       |       |       |
| 55           |                |       |       |       |       |       |       |       |       |       | 91.9           | 103.4 | 91.2  | 111.1 | 99.1  | 80.6  |       |       |       |       |       |       |       |       |       |       |       |
| 57           |                |       |       |       |       |       |       |       |       |       | 93.5           | 92.1  | 98.9  | 113.9 | 96.3  | 69.1  |       |       |       |       |       |       |       |       |       |       |       |

**S2 Table: Average scorpion weight variation. See below for complete caption.**

| Time (weeks) | 3rd experiment |       |       |       |       |       |       |       |       |       |       |       |       |       |       |       |       | Mean ± SEM |       |       |       |       |                 |                 |                |                |
|--------------|----------------|-------|-------|-------|-------|-------|-------|-------|-------|-------|-------|-------|-------|-------|-------|-------|-------|------------|-------|-------|-------|-------|-----------------|-----------------|----------------|----------------|
|              | C1             | C2    | C3    | C4    | C5    | FD1   | FD2   | FD3   | FD4   | WD1   | WD2   | WD3   | WD4   | WD5   | WD6   | WD7   | WD8   | FWD1       | FWD2  | FWD3  | FWD4  | FWD5  | C               | FD              | WD             | FWD            |
| 0            | 100.0          | 100.0 | 100.0 | 100.0 | 100.0 | 100.0 | 100.0 | 100.0 | 100.0 | 100.0 | 100.0 | 100.0 | 100.0 | 100.0 | 100.0 | 100.0 | 100.0 | 100.0      | 100.0 | 100.0 | 100.0 | 100.0 | 100 ± 0         | 100 ± 0         | 100 ± 0        | 100 ± 0        |
| 2            | 92.3           | 97.8  | 91.0  | 103.7 | 88.5  | 99.0  | 79.7  | 99.1  | 97.2  | 92.1  | 89.7  | 81.3  | 85.9  | 70.0  | 97.2  | 64.3  | 75.3  | 78.9       | 75.4  | 64.8  | 77.1  | 72.1  | 98.969 ± 1.444  | 97.241 ± 1.091  | 82.692 ± 2.741 | 78.507 ± 1.826 |
| 6            | 104.8          | 101.0 | 91.8  | 103.2 | 86.6  | 102.3 | 81.6  | 91.2  | 89.6  |       |       |       | 79.5  |       | 85.7  |       | 73.3  |            |       |       |       |       | 102.657 ± 1.561 | 92.507 ± 2.257  | 83.919 ± 3.746 |                |
| 8            | 105.0          | 101.8 | 92.8  | 95.4  | 99.3  | 98.0  | 78.2  | 88.6  | 83.0  |       |       |       |       |       | 81.3  |       |       |            |       |       |       |       | 104.905 ± 1.621 | 92.822 ± 1.847  | 81.272 ± 0     |                |
| 10           | 105.0          | 105.5 | 93.6  | 99.7  | 101.3 | 94.8  | 79.1  | 83.0  | 84.7  |       |       |       |       |       | 71.6  |       |       |            |       |       |       |       | 105.520 ± 1.455 | 91.224 ± 1.996  | 71.555 ± 0     |                |
| 12           | 101.6          | 106.9 | 94.9  | 98.1  | 102.2 | 93.3  | 77.0  | 84.4  | 81.3  |       |       |       |       |       | 69.8  |       |       |            |       |       |       |       | 105.190 ± 1.678 | 89.361 ± 1.521  | 69.788 ± 0     |                |
| 14           | 102.6          | 103.0 | 96.5  | 96.3  | 100.0 | 97.2  | 78.0  | 84.5  | 83.2  |       |       |       |       |       |       |       |       |            |       |       |       |       | 106.776 ± 1.857 | 87.187 ± 1.196  |                |                |
| 16           | 106.4          | 105.3 | 104.5 | 100.5 | 105.3 | 101.0 | 76.9  | 83.5  | 80.8  |       |       |       |       |       |       |       |       |            |       |       |       |       | 107.937 ± 1.403 | 86.691 ± 1.614  |                |                |
| 19           | 100.3          | 108.9 | 96.3  | 96.1  | 105.9 | 91.7  | 60.8  | 101.6 | 83.8  |       |       |       |       |       |       |       |       |            |       |       |       |       | 107.693 ± 1.886 | 86.500 ± 2.213  |                |                |
| 21           | 100.0          | 104.6 | 97.1  | 98.6  | 106.4 | 82.4  | 56.4  | 92.0  | 97.0  |       |       |       |       |       |       |       |       |            |       |       |       |       | 106.991 ± 1.687 | 84.732 ± 2.243  |                |                |
| 24           | 116.8          | 106.3 | 91.2  | 102.9 | 101.5 | 77.8  | 45.5  | 81.8  | 56.4  |       |       |       |       |       |       |       |       |            |       |       |       |       | 108.924 ± 2.442 | 80.940 ± 2.786  |                |                |
| 26           | 98.7           | 104.1 | 89.0  | 94.0  | 117.9 | 72.7  | 48.1  | 79.4  |       |       |       |       |       |       |       |       |       |            |       |       |       |       | 107.920 ± 2.680 | 85.431 ± 2.804  |                |                |
| 28           | 96.4           | 109.1 | 100.3 | 96.0  | 115.0 | 72.0  | 48.1  | 86.6  |       |       |       |       |       |       |       |       |       |            |       |       |       |       | 107.446 ± 2.392 | 85.704 ± 2.584  |                |                |
| 30           | 92.9           | 105.9 | 92.2  | 93.6  | 127.7 | 67.4  | 45.5  | 116.1 |       |       |       |       |       |       |       |       |       |            |       |       |       |       | 104.389 ± 2.842 | 79.924 ± 6.279  |                |                |
| 34           | 101.1          | 119.0 | 94.7  | 97.2  | 125.9 | 82.0  | 46.3  | 96.1  |       |       |       |       |       |       |       |       |       |            |       |       |       |       | 106.897 ± 2.599 | 79.674 ± 5.945  |                |                |
| 36           | 104.3          | 116.6 | 98.7  | 102.2 | 132.3 | 115.1 | 44.6  | 95.1  |       |       |       |       |       |       |       |       |       |            |       |       |       |       | 108.651 ± 2.660 | 81.737 ± 6.257  |                |                |
| 38           | 109.0          | 121.4 | 98.6  | 98.7  | 138.4 | 119.7 | 42.8  |       |       |       |       |       |       |       |       |       |       |            |       |       |       |       | 107.952 ± 2.750 | 78.405 ± 7.416  |                |                |
| 40           | 87.2           | 122.1 | 91.7  | 97.4  | 135.6 | 129.8 | 43.7  |       |       |       |       |       |       |       |       |       |       |            |       |       |       |       | 105.558 ± 3.099 | 77.449 ± 7.868  |                |                |
| 42           | 115.9          | 119.5 | 93.9  | 96.0  | 133.6 | 125.2 | 42.0  |       |       |       |       |       |       |       |       |       |       |            |       |       |       |       | 106.381 ± 3.280 | 74.432 ± 7.536  |                |                |
| 48           | 104.2          | 112.7 | 94.8  | 85.3  | 121.4 | 105.9 | 35.8  |       |       |       |       |       |       |       |       |       |       |            |       |       |       |       | 108.696 ± 2.852 | 69.026 ± 10.759 |                |                |
| 50           | 113.1          | 110.8 | 89.9  | 86.2  | 120.6 | 100.4 | 36.7  |       |       |       |       |       |       |       |       |       |       |            |       |       |       |       | 103.114 ± 2.805 | 70.500 ± 13.005 |                |                |
| 52           | 120.6          | 116.4 | 87.0  | 84.4  | 118.2 |       | 36.7  |       |       |       |       |       |       |       |       |       |       |            |       |       |       |       | 103.174 ± 3.600 | 59.830 ± 16.346 |                |                |
| 54           | 113.1          | 109.1 | 90.1  | 78.9  | 115.6 |       |       |       |       |       |       |       |       |       |       |       |       |            |       |       |       |       | 104.743 ± 2.588 | 89.922 ± 0      |                |                |
| 55           |                |       |       |       |       |       |       |       |       |       |       |       |       |       |       |       |       |            |       |       |       |       | 99.354 ± 2.834  | 80.620 ± 0      |                |                |
| 57           |                |       |       |       |       |       |       |       |       |       |       |       |       |       |       |       |       |            |       |       |       |       | 98.939 ± 2.668  | 69.062 ± 0      |                |                |

**S2 Table: Average scorpion weight variation.** Scorpion weight variation per group throughout the weeks of experiment (0-57). The weight is expressed as a percentage relative to the weight at the beginning of the experiment. Therefore, an increase in the number means that either an animal lighter than average died, increasing the group average, or that animals put on weight. A decrease in the number means that either a heavier than average animal died, decreasing the group average, or that animals lost weight. Experimental groups are divided in the three independent experiments conducted. The first experiment did not include water or food and water deprivation, hence the lower number of groups. C: Control; FD: Food deprivation; WD: Water deprivation; FWD: Food and water deprivation.
